# Supplementary material
Source: PubMed Central journal article supplement (PMC4023425)
Supplement: supp_blood-2013-03-489286_blood-2013-03-489286-1.pdf [file supp_blood-2013-03-489286_blood-2013-03-489286-1.pdf]

## SUPPLEMENTARY FIGURE LEGENDS

### ***Suppl. Figure 1: Impaired LN development in $Clec1b^{-/-}$ embryos***

**A-D**, Flow-cytometric analysis showing the gating of Ter119<sup>+</sup>CD41<sup>+</sup> platelets (**A**) and the expression of CLEC-2 on platelets in the blood of E14.5  $Clec1b^{+/+}$  and  $Clec1b^{-/-}$  littermates (**B**), E14.5 (**C**) and newborns (**D**)  $Clec1b^{fl/fl}$  and  $Clec1b^{fl/fl}PF4-Cre$  littermates.

### ***Suppl. Figure 2: Increased spleen/body ratio weight in $Clec1b^{fl/fl}PF4-Cre$ mice***

**A**, Chart showing the weight ratio spleen/body of  $Clec1b^{fl/fl}$  and  $Clec1b^{fl/fl}PF4-Cre$  adult littermates. **B**, Immunofluorescence analysis of section from adult spleen stained with B220 (green), Gp38/Podoplanin (red) and CD4 (blue) antibodies (first column) and with CD31 (green), IgM (red) and Lyve-1 (blue) antibodies (second column).

### ***Suppl. Figure 3: Normal haematopoietic composition of the LNs in $Clec1b^{fl/fl}PF4-Cre$ mice***

**A**, Flow-cytometric analysis of mixed inguinal and mesenteric LNs single cell suspensions from 6-7 week old  $Clec1b^{fl/fl}$  and  $Clec1b^{fl/fl}PF4-Cre$  mice stained with Ter119, CD3 B220, CD11c, IgM and IgD. Percentages of Ter119<sup>+</sup> red blood cells are shown in the histograms (first column). Percentages of CD3<sup>+</sup> T cells and B220<sup>+</sup> B cells (second column), CD11c<sup>+</sup>B220<sup>-low</sup> dendritic cells (third column), IgM<sup>high</sup>IgD<sup>-low</sup> immature and IgD<sup>High</sup>IgM<sup>-Low</sup> mature B lymphocytes (forth column) are shown in the dot plots.

***Suppl. Figure 4: Clec1b<sup>fl/fl</sup>/PF4-cre bone marrow reconstitution led to the LN blood filled phenotype***

**A**, Macroscopic appearance of mesenteric (left) and inguinal (right) LNs from adult WT mice reconstituted with *Clec1b<sup>fl/fl</sup>* and *Clec1b<sup>fl/fl</sup>PF4-Cre* BM. **B**, Immunofluorescence analysis of LN sections of WT mice reconstituted with *Clec1b<sup>fl/fl</sup>PF4-Cre* BM stained for CXCL13 (green), CD11c (red), and CD4 (blue) (left) and CCL21 (green), ERTR-7 (red) and CD3 (blue) (right). **C**, Chart showing the absolute number of CD4<sup>+</sup> T cells and CD8<sup>+</sup> T cells per inguinal and mesenteric LNs from WT mice reconstituted with *Clec1b<sup>fl/fl</sup>* (black circle) or *Clec1b<sup>fl/fl</sup>PF4-Cre* (open circles) BM. Unpaired Student's t test, \*p<0.05, \*\*\* p<0.005.

***Suppl. Figure 5: Model showing the role of CLEC-2 in LNs formation and function***

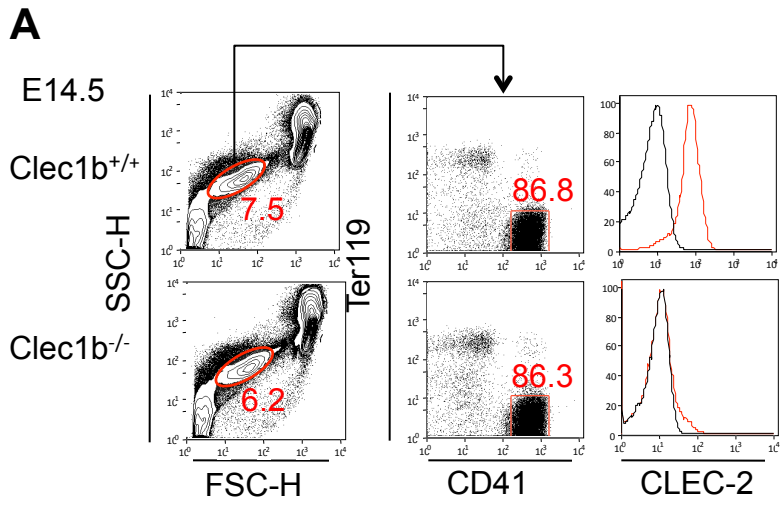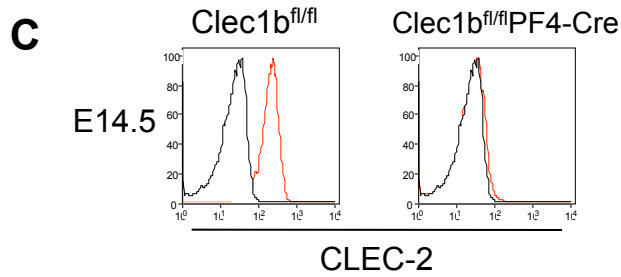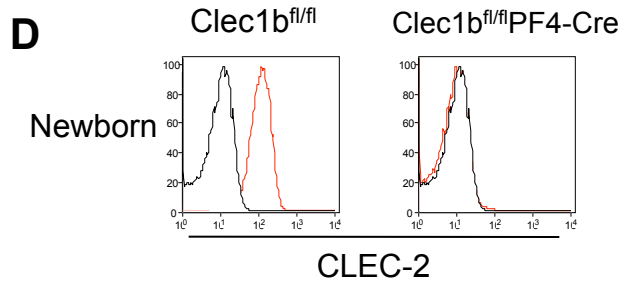



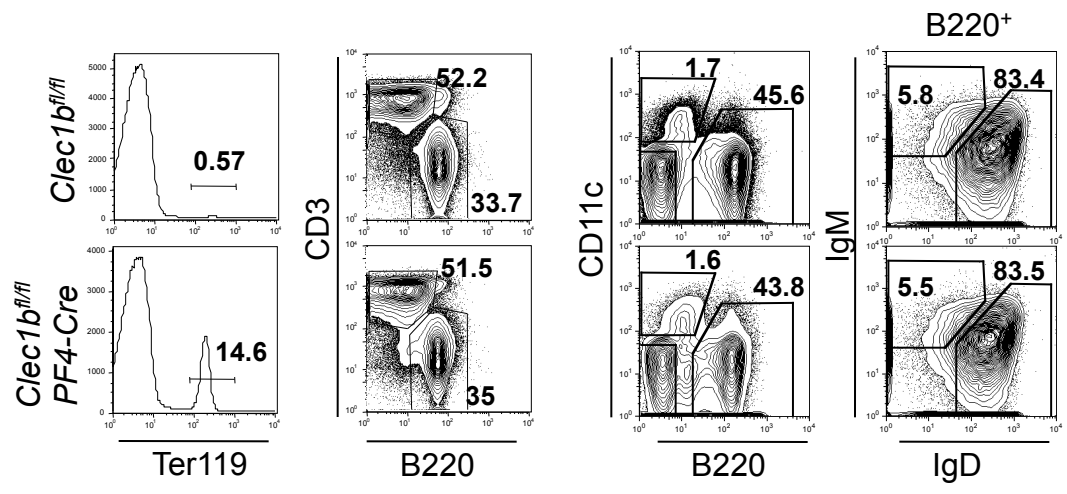

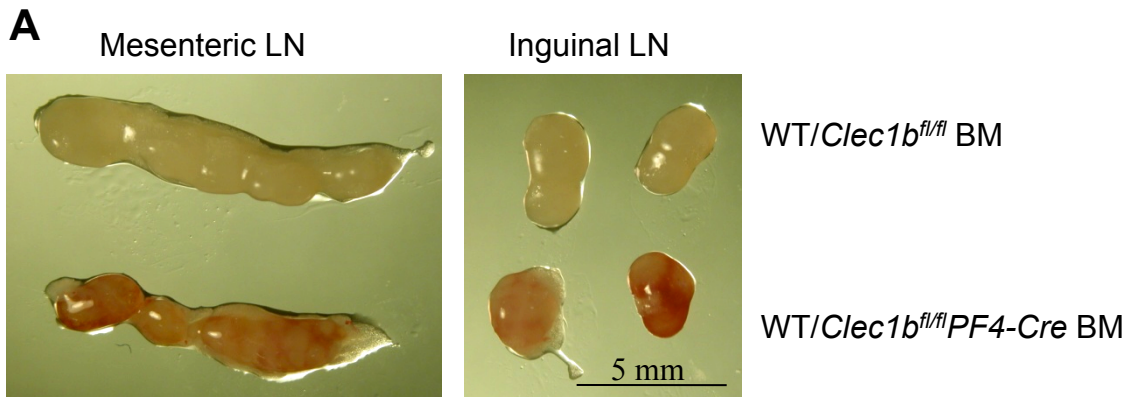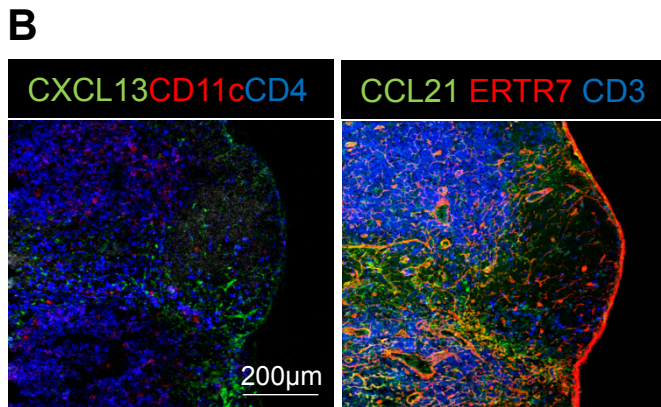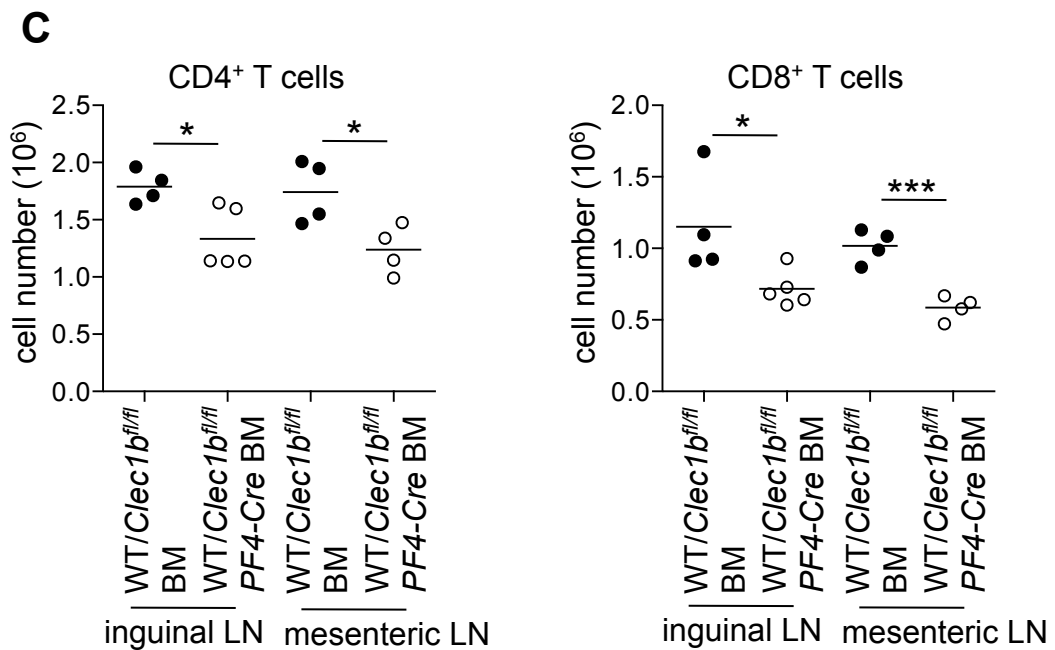

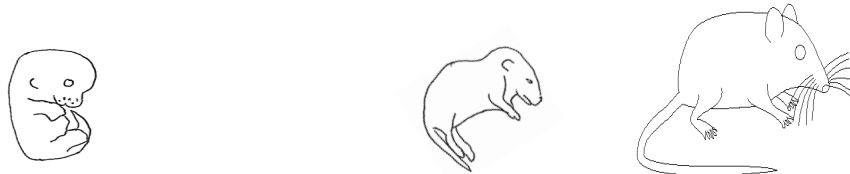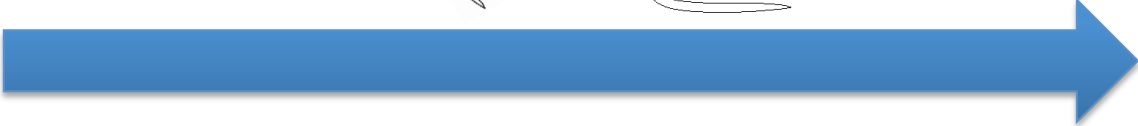

Formation of the lymphatic vasculature

Formation of LNs

Primary immune response

Re-immunisation

WT

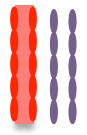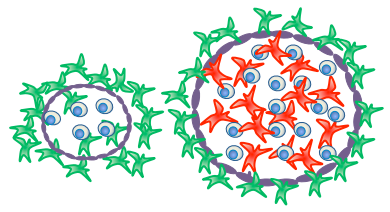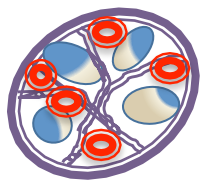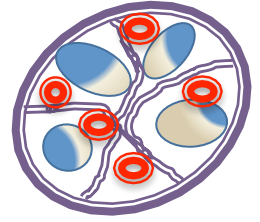

*Clec1b<sup>fl/fl</sup> PF4-Cre*  
(loss of CLEC-2 on platelets)

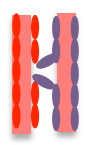

blood-lymphatic mixing

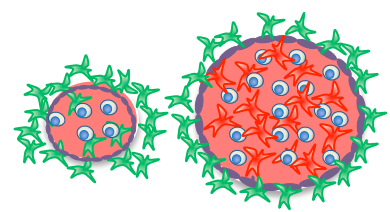

Development of bloody LNs

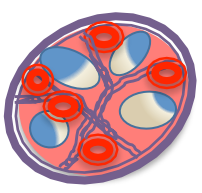

Normal primary immune responses

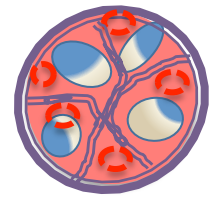

Defect in subsequent recruitment of naïve T cells and B cells (leaky HEV?)

*Clec1b<sup>-/-</sup>*

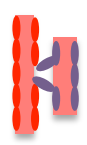

blood-lymphatic mixing  
Impaired lymphatic growth (defect in LEC proliferation)

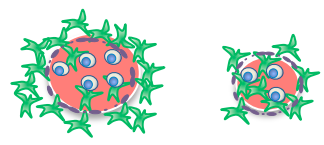

Defect in lymphatic growth leads to abortion of LN formation

- BEC
- LEC
- Mesenchymal cells
- LTi cells
- LTo cells
- HEV
